# Supplementary material
Source: Springer Nature journal article supplement (https://www.springerprofessional.de/resource/supplementary/13638_2013_841_MOESM1_ESM.pdf/11898584)
Supplement: MOESM1 [file 11898584]

Fingerprint indoor positioning

```
graph TD; A[Fingerprint indoor positioning] --- B[Deterministic approach]; A --- C[Probabilistic approach]; A --- D[Machine learning approach];
```

Deterministic  
approach

Probabilistic  
approach

Machine learning  
approach
